# Supplementary material for: Small size fullerenol nanoparticles suppress lung metastasis of breast cancer cell by disrupting actin dynamics
Source: PubMed Central journal article supplement (PMC6015447; doi:10.1186/s12951-018-0380-z), 2018-06-23

Supplementary data

**Small size fullerene nanoparticles suppress lung metastasis of breast cancer cell  
by disrupting actin dynamics**

Yanxia Qin<sup>1,2</sup>, Kui Chen<sup>2,3</sup>, Weihong Gu<sup>2,3</sup>, Xinghua Dong<sup>2,3</sup>, Ruihong Lei<sup>2</sup>,  
Yanan Chang<sup>2</sup>, Xue Bai<sup>2,3</sup>, Shibo Xia<sup>2,3</sup>, Li Zeng<sup>2</sup>, Jiaxin Zhang<sup>2,3</sup>, Sihan Ma<sup>2</sup>,  
Juan Li<sup>2</sup>, Shan Li<sup>1,\*</sup> & Gengmei Xing<sup>2,\*</sup>

<sup>1</sup> School of Biology and Biological Engineering, South China University of  
Technology, Guangzhou, 510006, People's Republic of China

<sup>2</sup> CAS Key Laboratory for Biomedical Effects of Nanomaterial & Nanosafety,  
Institute of High Energy Physics, Chinese Academy of Sciences, Beijing 100049,  
People's Republic of China

<sup>3</sup> University of Chinese Academy of Sciences, Beijing 100049, People's Republic of  
China

Yanxia Qin and Kui Chen contributed equally to this work

\* Corresponding author

**Additional figures:**

**Figure S1.** The cytotoxicity assessment of fullereneol to breast cancer cells. Calcein-AM/PI was used to stain live and dead cells. Live cells were labeled with calcein-AM and dead cells were labeled with propidium iodide. Scale bar = 200  $\mu\text{m}$ .

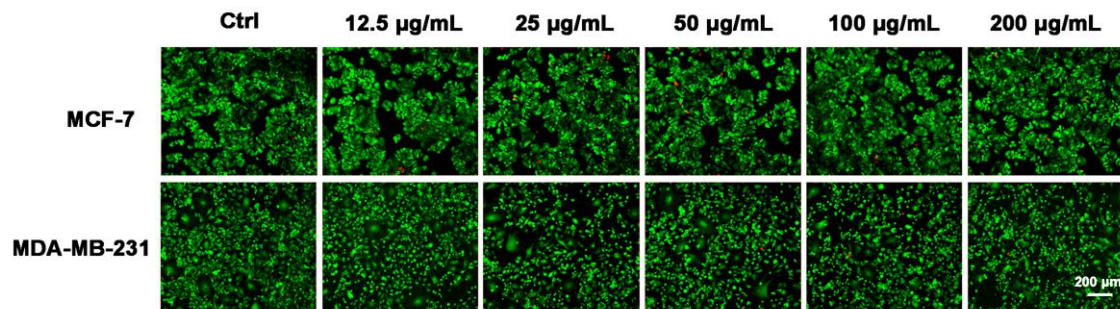

**Figure S2.** Early apoptosis induced by fullereneol in breast cancer cells. Staining of MCF-7 (A) and MDA-MB-231 cells (B) treated with fullereneol for 24 hr with the mitochondrial membrane sensor JC-1. The red JC-1 aggregate was typical of healthy mitochondria and green JC-1 monomer represented mitochondria membrane damaged. Scale bar = 10  $\mu\text{m}$ .

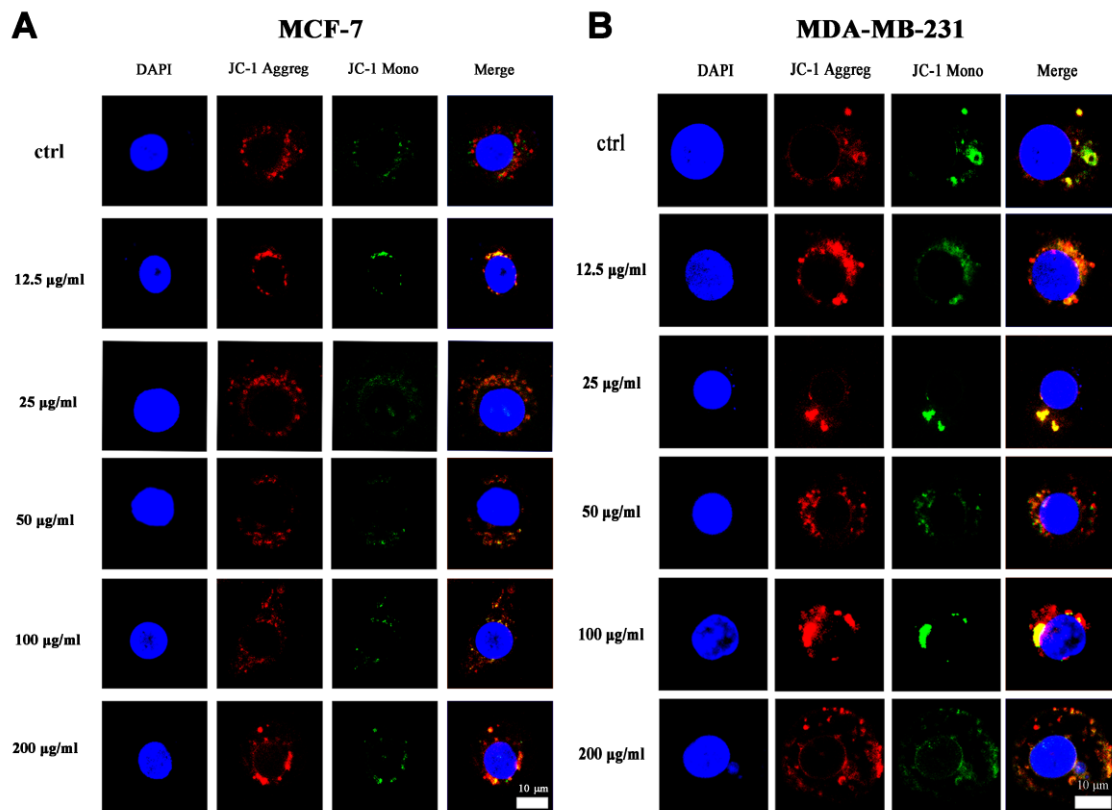

**Figure S3.** Body weight-time graph. Nude mice were divided into three groups (control, fulleranol, and blank group, n=5/group). The weight of nude mice were recorded every other days. The body weight had no significant difference compared with blank group.

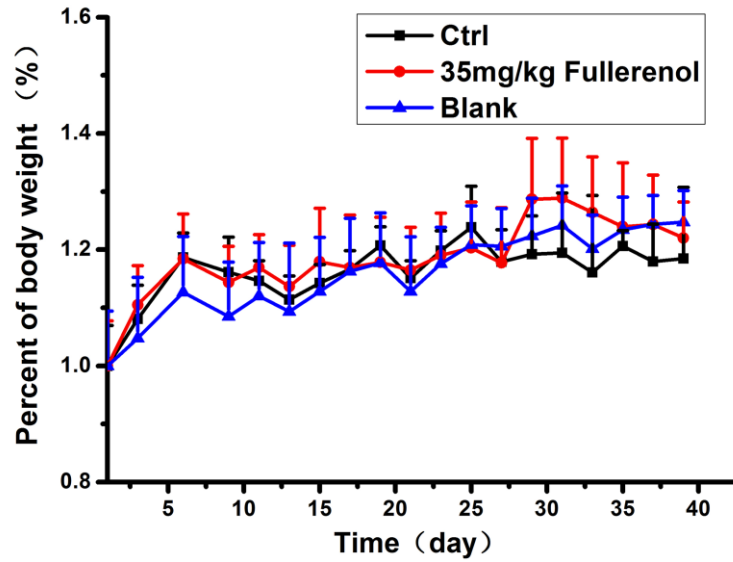

**Figure S4.** Histological examination of metastatic lesions in other organs (heart, liver, spleen, kidney). The metastatic microcolonies of breast cancer cell not appeared in other organs of all groups.

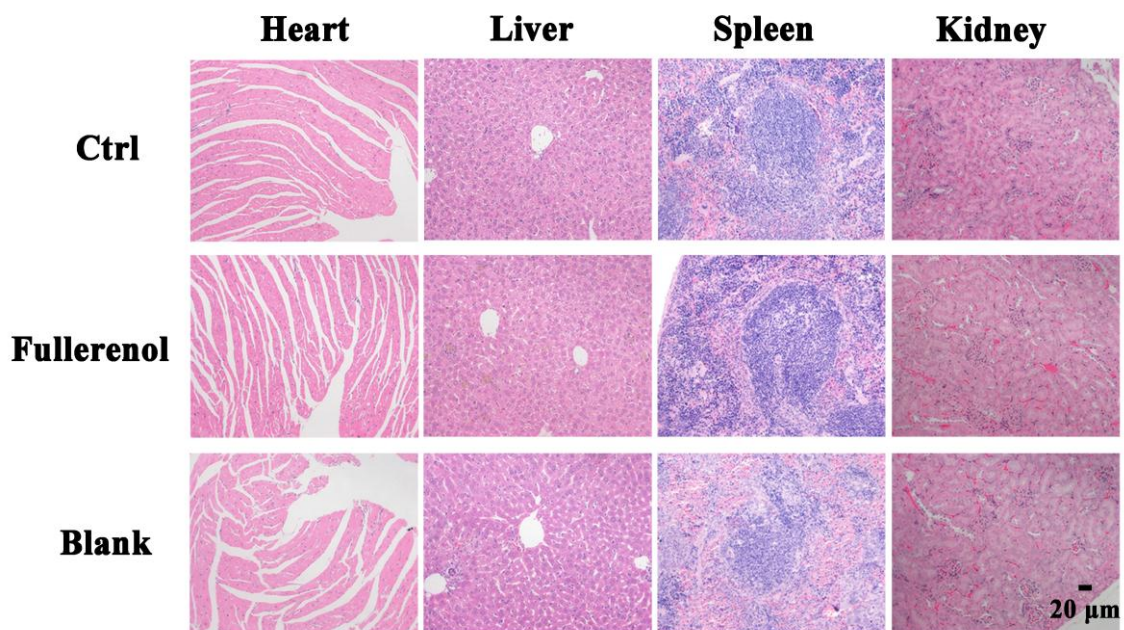

**Figure S5.** Histological examination of metastatic lesions in lung. The typical image of the lung tissue with different magnification and the whole lung.

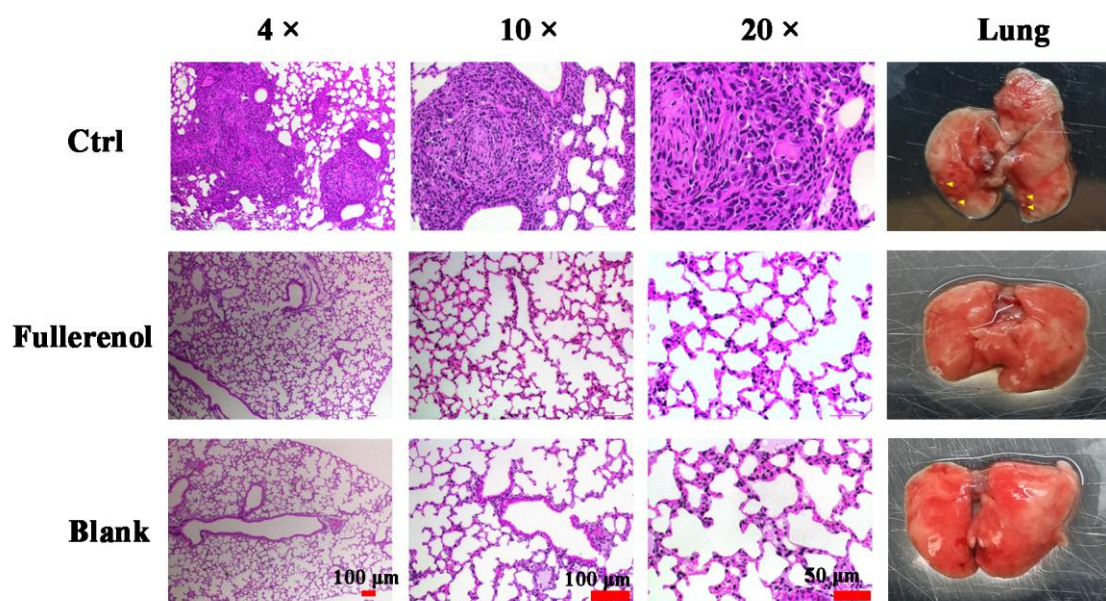

**Figure S6.** Effect of fullerenol on actin cytoskeleton in cancer cells. The several cancer cell lines (A) (B) Caco-2 cells (C) (D) HeLa cells (E) (F) HepG2 cells (G) (H) MB-49 cells (I) (J) MCF-7 cells (K) (L) MCF-10A cells were treated with fullerenol at 200  $\mu\text{g}/\text{mL}$  for 24 h. By contrast, the cells were stained with Rhodamine-labeled phalloidin and Hoechst 33342 for visualization. Scale bar = 10  $\mu\text{m}$ . The actin filament was invisible and disorder with fullerenol treatment.



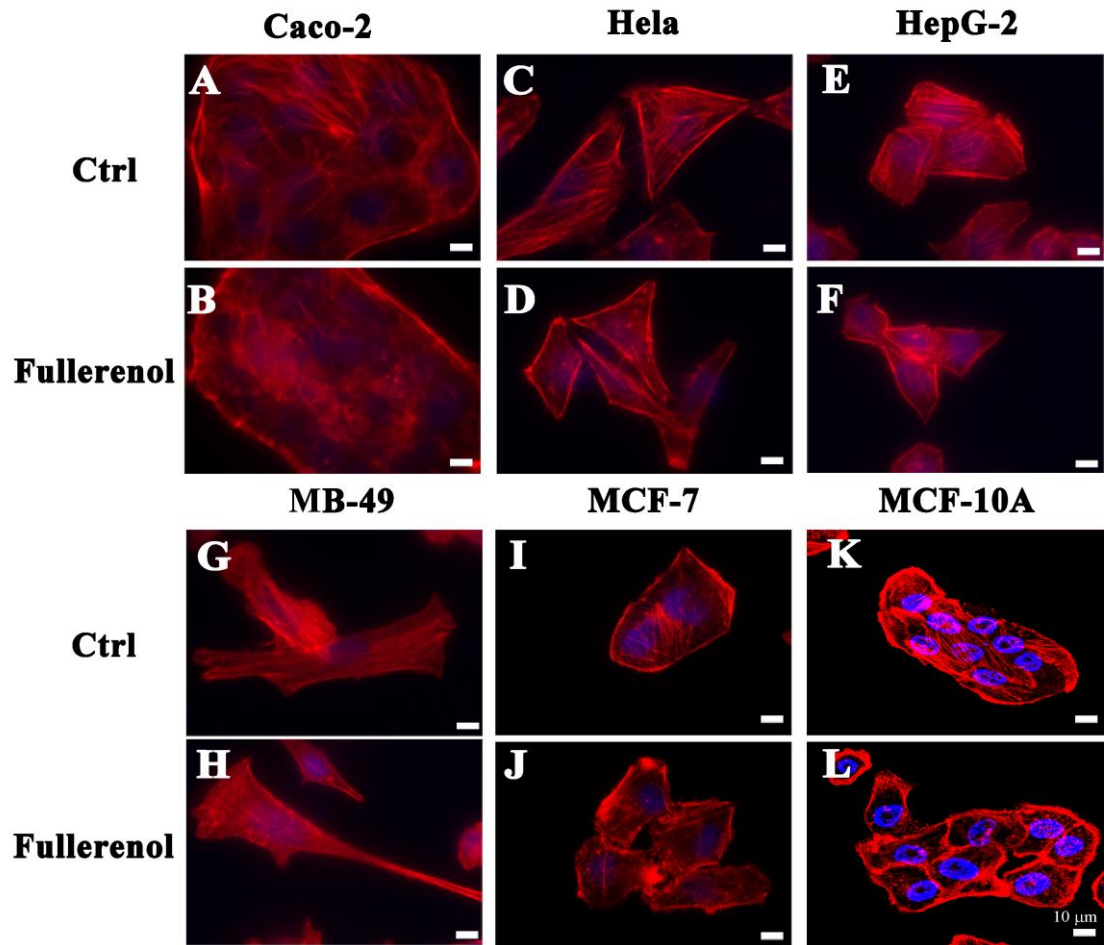

**Figure S7.** Western blot analyzed G-Actin and F-Actin expression in MCF-7 cells. The MCF-7 cells were treated with fullereneol at 200  $\mu\text{g}/\text{mL}$  for 24 h, G-actin (soluble actin) and F-actin (insoluble actin) were extracted by soluble actin extraction solution and insoluble actin extraction solution. Fullereneol reduced content of F-actin with a dose-dependent manner and the reduction was accompanied by increased G-actin content in treated cell.

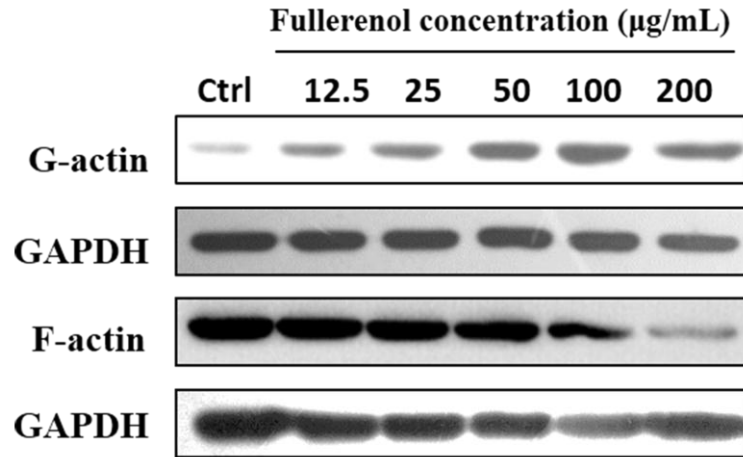

**Figure S8.** The evaluation of non-tumoural cell's stiffness. Young's modulus values obtained by AFM to assess the stiffness of MCF-10A cells. The cells were treated with fullerene (200 µg/mL) for 24 h. Error bars represent mean ± SD; \*P < 0.05 and \*\*P < 0.01 (n ≥ 100).

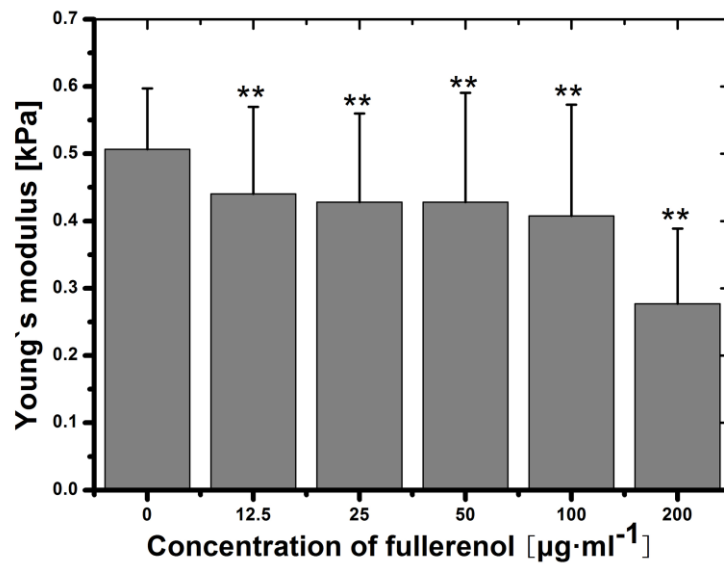

**Figure S9.** The influence of fullerene on integrin β1. Immunofluorescence images of phalloidin staining in MDA-MB-231 cells treated fullerene nanoparticles (200 µg/mL) for 24 h. Green = integrin β1, red = actin cytoskeleton, blue = nucleus. Scale bar = 20 µm.

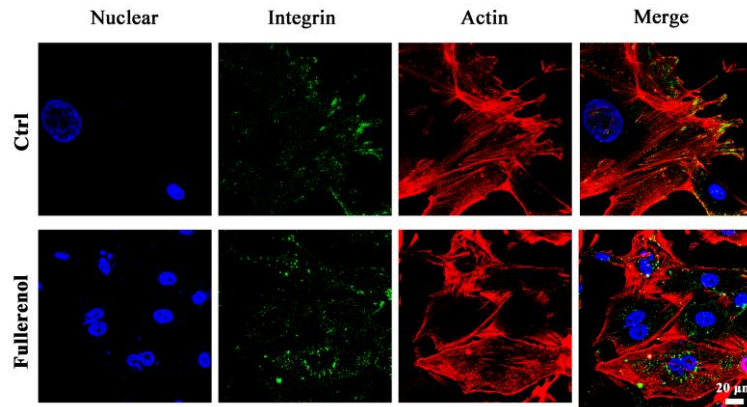

**Figure S10.** The evaluation of fluorescence intensity of integrin  $\beta 1$  by flow cytometry. The cells were cultured and 200  $\mu\text{g}/\text{mL}$  fullerene nanoparticles was treated for 24 h. Acquisition of > 5000 events was performed by flow cytometry. The content of integrin had no obvious effect on cells treated with fullerene.

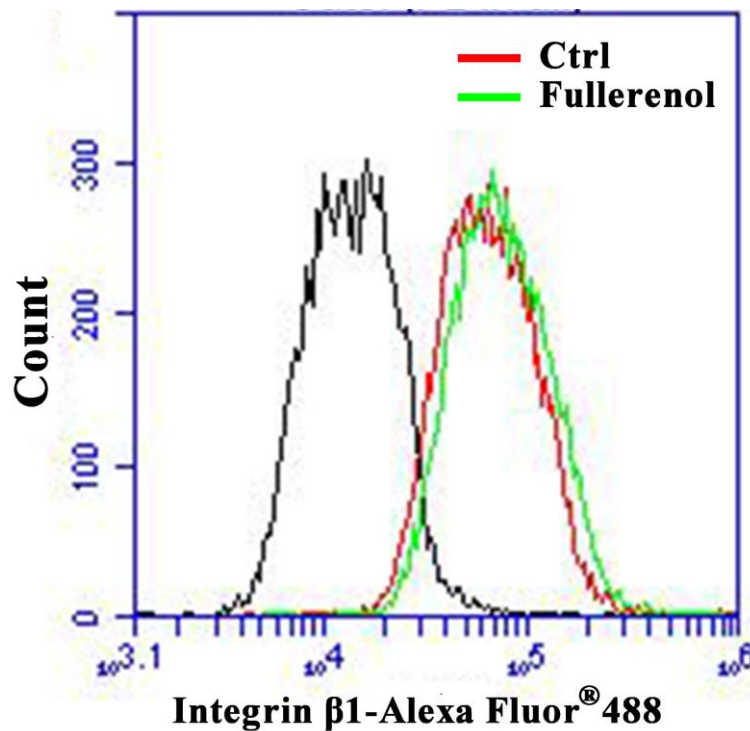

**Figure S11.** *In vitro* inhibitory effects of fullerene on cell migration. The cells were treated 200  $\mu\text{g}/\text{mL}$  fullerene nanoparticles for 24 h. Wound healing assay was performed to detect the



anti-migratory ability of fullereneol in (A) (B) Caco-2 cells. (C) (D) Hela cells. (E) (F) HepG-2 cells. (G) (H) MB-49 cells. (I) (J) MCF-7 cells. Scare bar = 200  $\mu$ m.

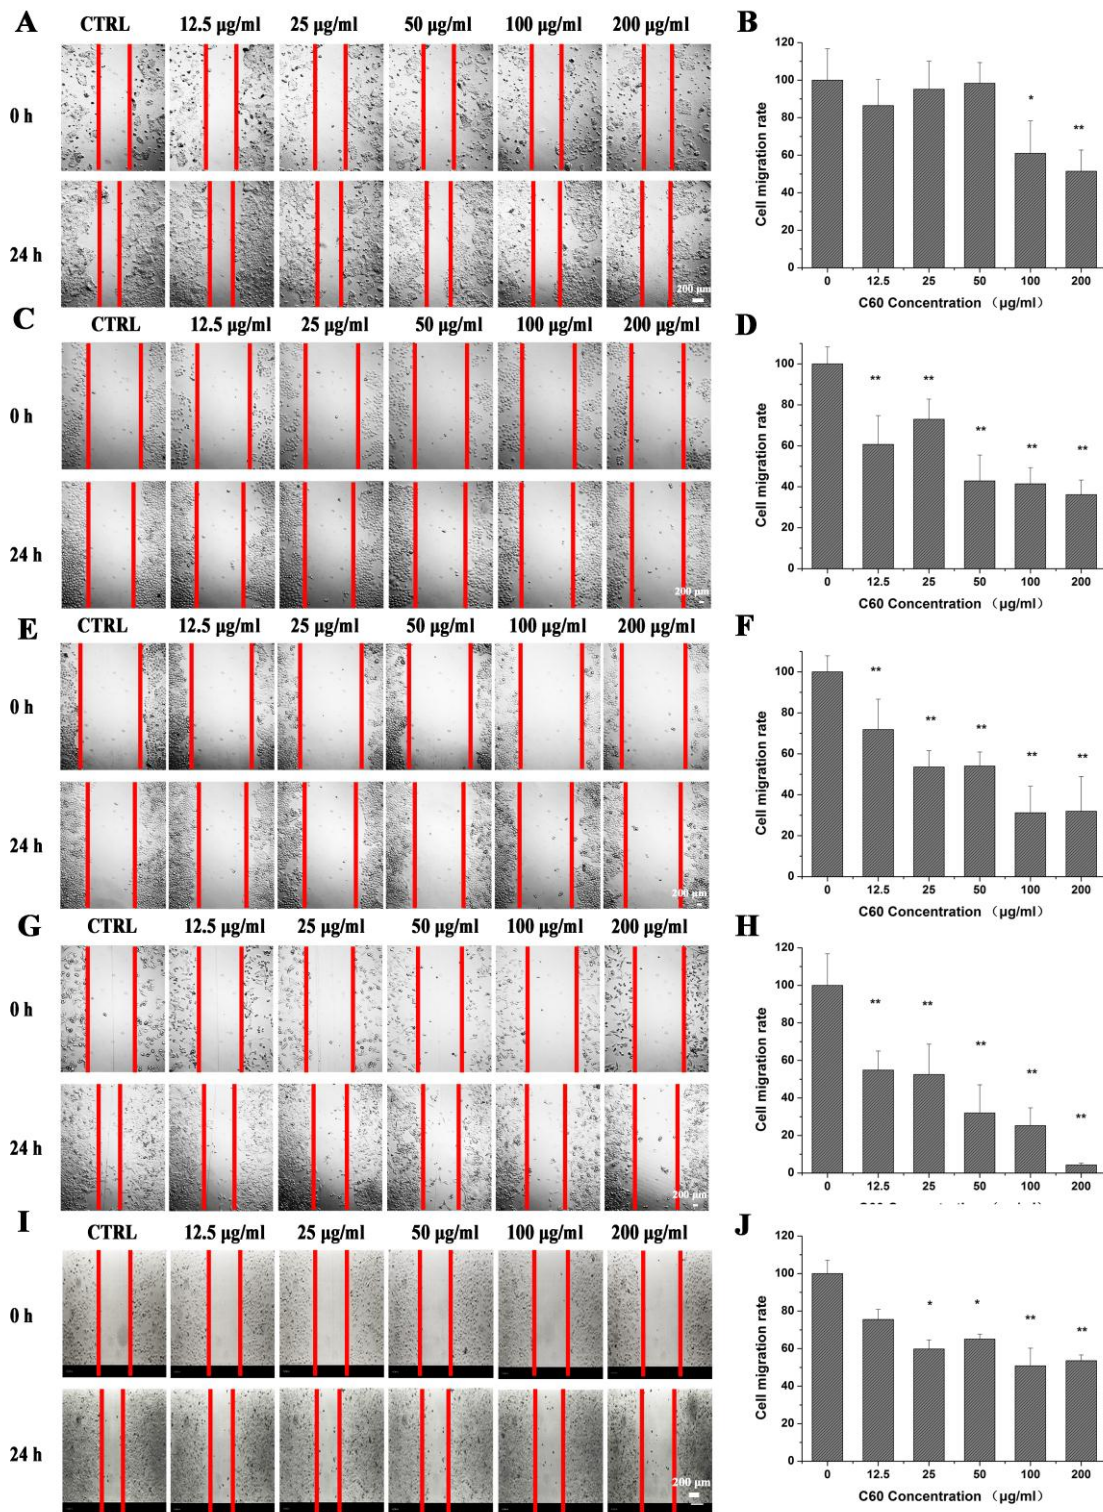

Supplement: 12951_2018_380_MOESM1_ESM.pdf [file 12951_2018_380_MOESM1_ESM.pdf]
